# Supplementary material
Source: PubMed Central journal article supplement (PMC3185343)
Supplement: embor2011158s2.pdf [file embor2011158s2.pdf]

**ONLINE SUPPLEMENTAL MATERIAL FOR**

**Lac Operator repeats generate a traceable fragile site  
in mammalian cells**

Ariana Jacome and Oscar Fernandez-Capetillo

*Genomic Instability Group. Spanish National Cancer Research Centre (CNIO).  
Madrid, 28029, Spain*

**Supplementary Video 1. Example of a mitosis in 3T3<sup>lacO</sup> cells.** 3T3<sup>lacO</sup> cells were previously transfected with an H2B-EGFP expression plasmid (green) to allow the visualization of chromatin in real time, together with the lacR-cherry (red) expression plasmid to visualize the dynamics of the lacO sequence. The movie illustrates that the lacO sequence finds difficulties in completing mitosis and undergoes frequent stretching in an anaphase bridge.
